# Supplementary material
Source: PubMed Central journal article supplement (PMC3483356)
Supplement: NIHMS405886-supplement-1.pdf [file NIHMS405886-supplement-1.pdf]

# Supplementary Figure: Paired Pulse Ratio

NN-A37164

Silent synapses in selectively activated nucleus accumbens neurons following cocaine-sensitization

Eisuke Koya, Fabio C. Cruz, Robert Ator, Sam A. Golden, Alexander F. Hoffman<sup>1</sup>, Carl R. Lupica<sup>1,2</sup>, Bruce T. Hope<sup>2</sup>

Behavioral Neuroscience Branch, IRP/NIDA/NIH/DHHS, 251 Bayview Drive, Baltimore, MD 21224, USA

<sup>1</sup>Electrophysiology Research Section, IRP/NIDA/NIH/DHHS, 333 Cassell Drive, Baltimore, MD 21224, USA

<sup>2</sup>Co-senior authors

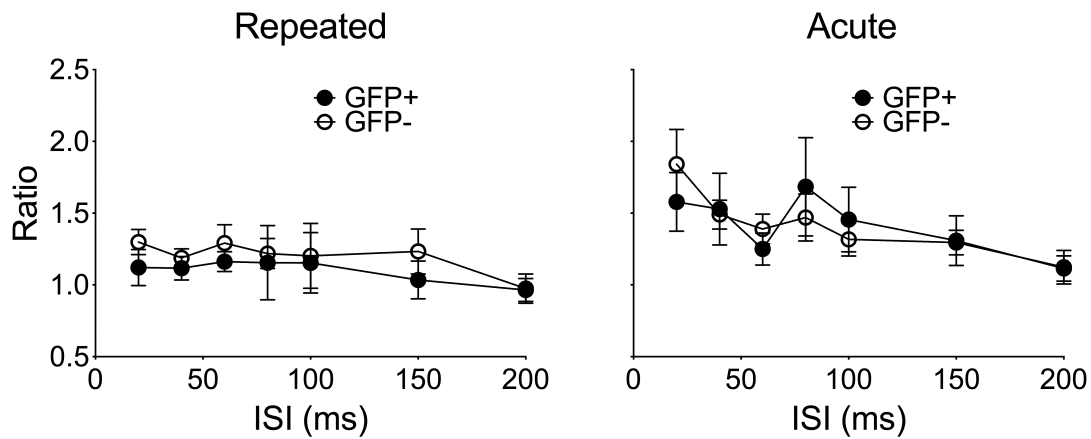

Supplementary figure. Paired pulse ratios do not differ between GFP+ and GFP- neurons in the Repeated and Acute cocaine groups. (Data are expressed as mean±SEM).
